# Supplementary material for: Spatial variation of the colonic microbiota in patients with ulcerative colitis and control volunteers
Source: PubMed Central journal article supplement — Gut. 2015 Jan 16;64(10):1553–61. doi: 10.1136/gutjnl-2014-307873 (PMC4602252; doi:10.1136/gutjnl-2014-307873), 2015-01-16

## Supplementary figure Legends

### Supplementary figure 1

Workflow for generating spatial eigenvectors from the connexion matrix.

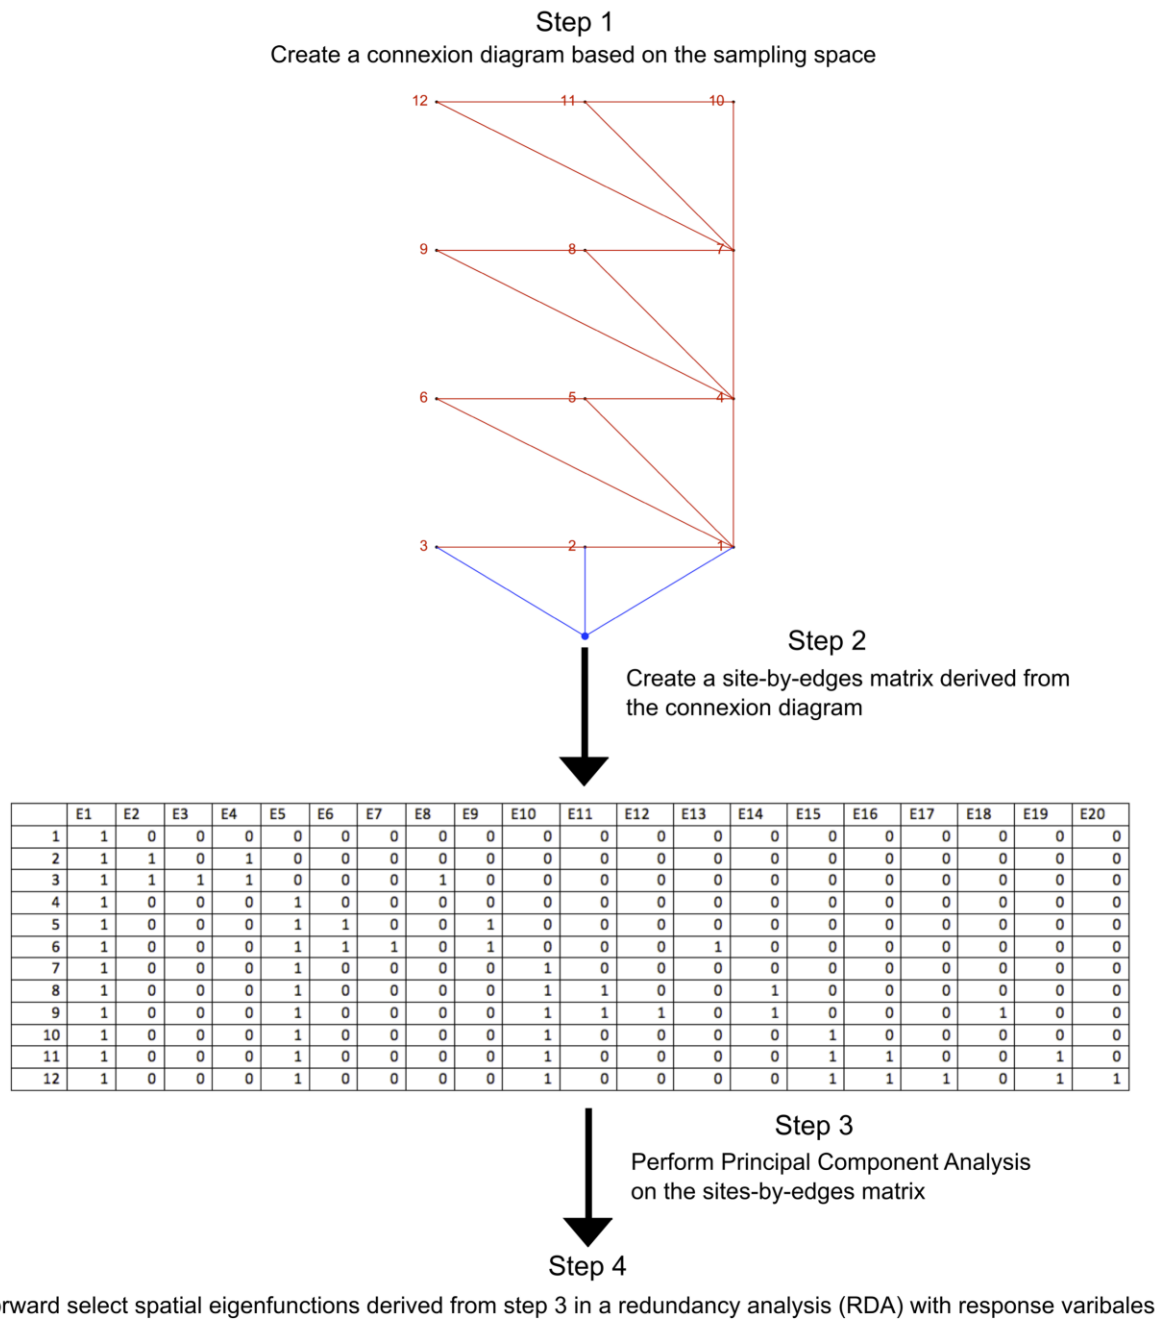

Supplementary figure 2

A diagram illustrating the sampling grid and how idealised cross-sectional and longitudinal gradients are represented by fitted RDA values. This is provided as an aid to interpreting Figure 3.

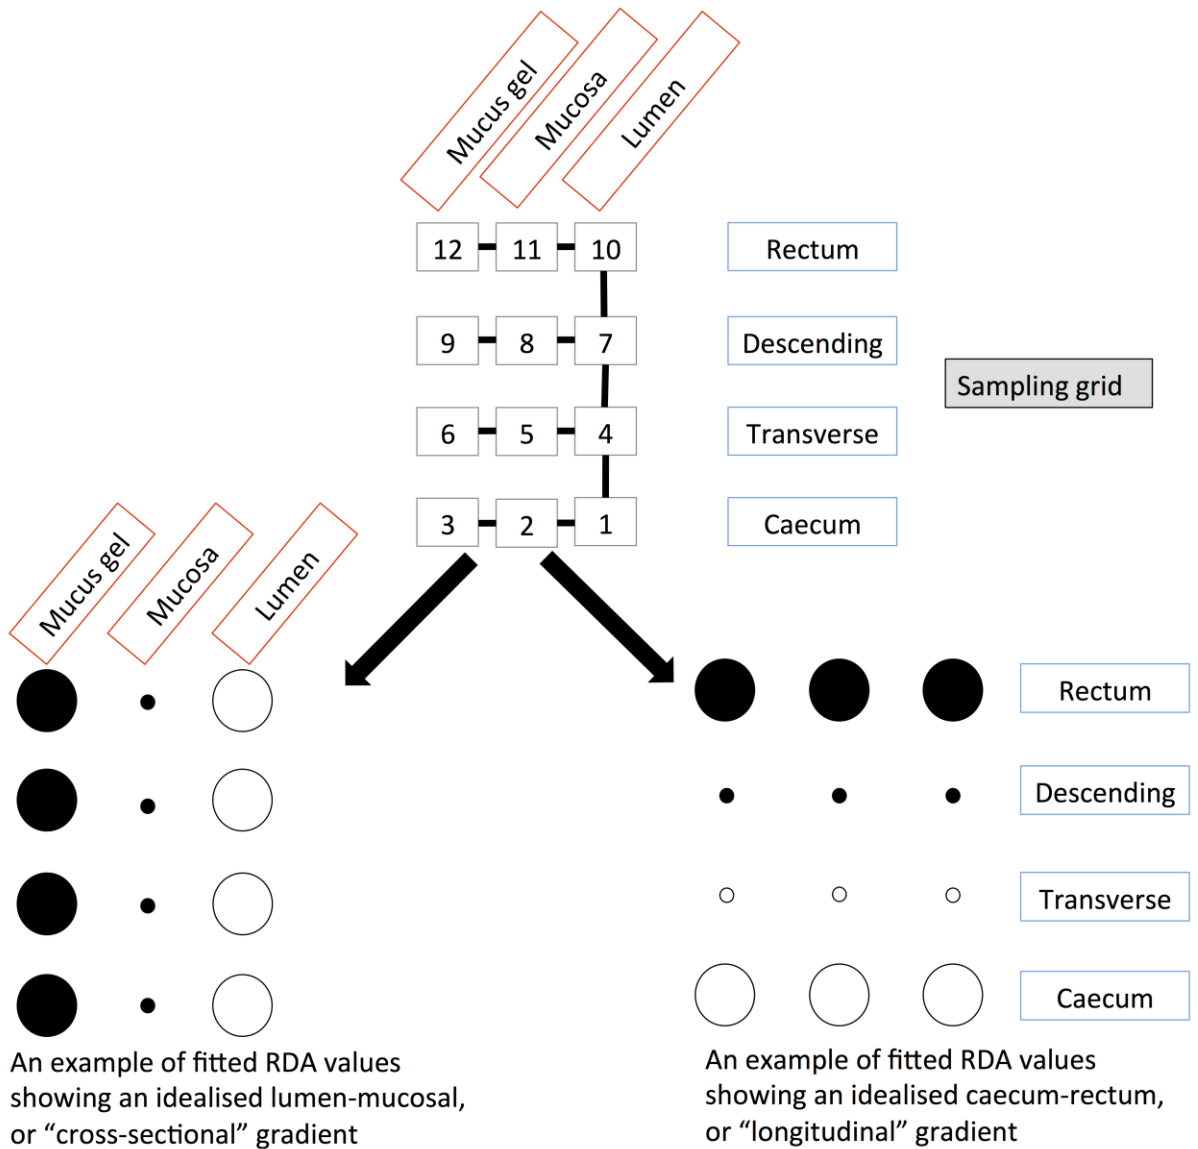

### Supplementary figure 3

Between Class Analysis (BCA) of Hellinger-transformed family-level abundances (A).  
Percentage of variance explained by the BCA (B).

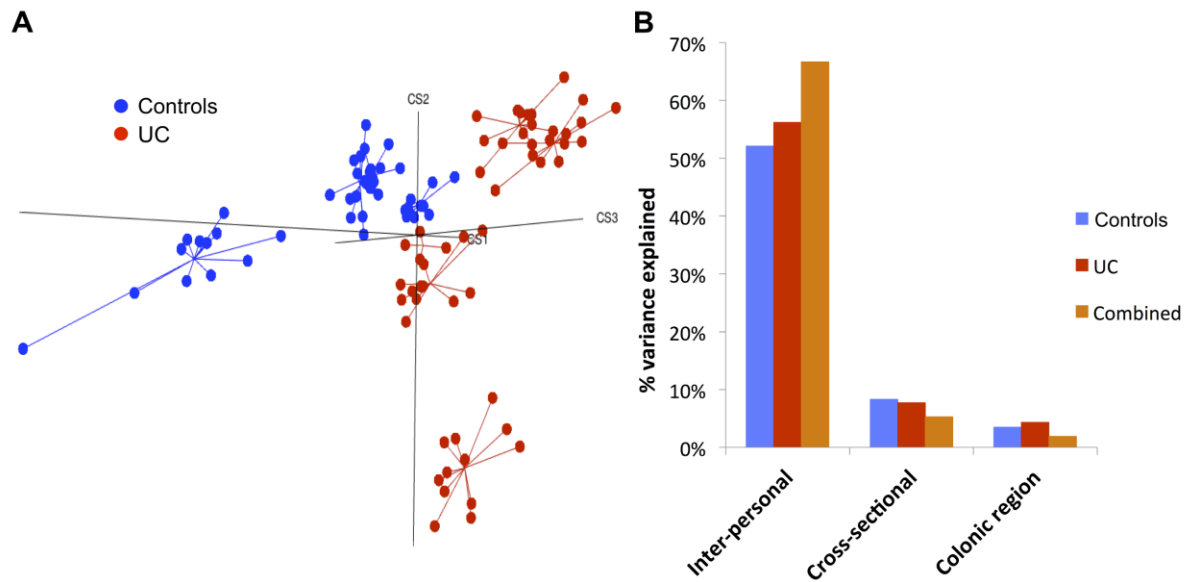

### Supplementary figure 4

Bacterial family-level abundances represented from the lumen to mucosa to mucus gel for all samples in both cohorts combined. The families are split into three groups; those that show a greater abundance in luminal compared to the mucosal layers, those that show no gradient and those that are more abundant in the mucosal layers when compared to the lumen. Abundances are represented proportionally to the area by bubble plots and the mean abundances with standard deviation are given in Supplementary table 2. An asterisk is placed beside those families that demonstrate a statistically significant difference across the three levels as determined by the Kruskal-Wallis test.

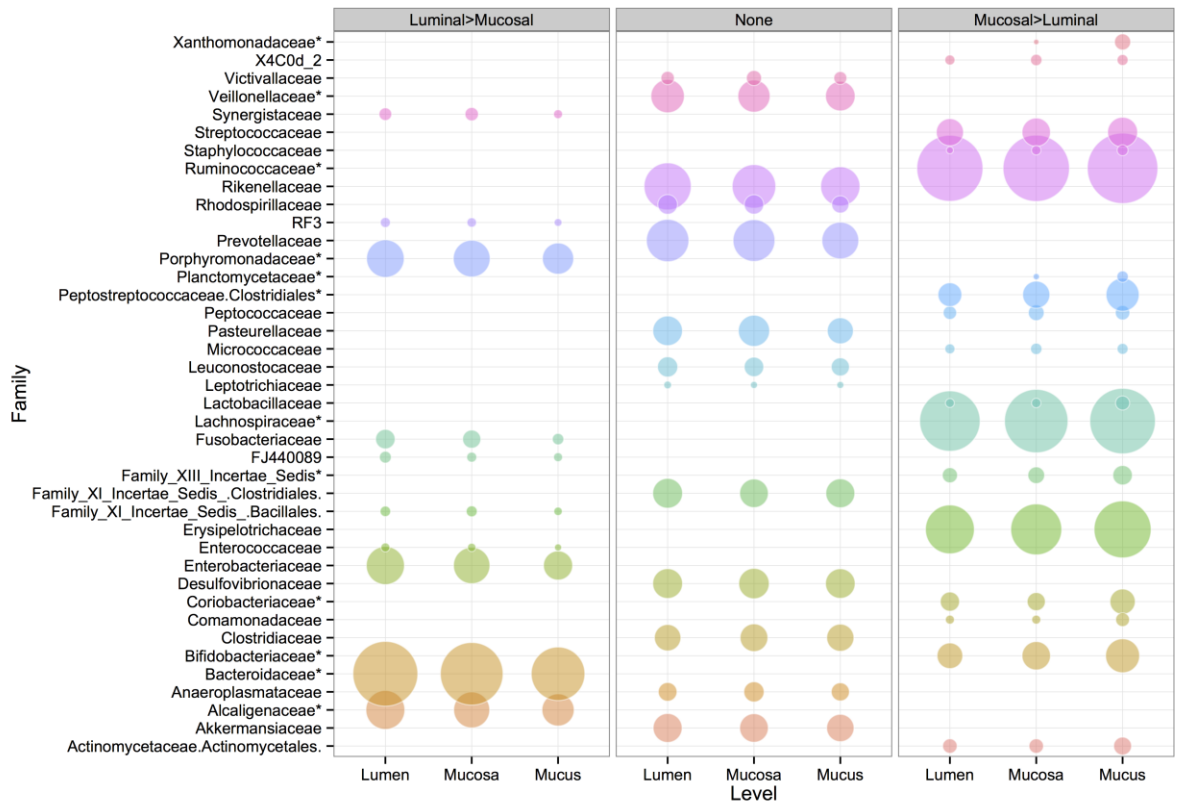

Supplementary figure 5

(A) Z-scores from the Wilcoxon test, ranked from most abundant in the lumen to most abundant in the mucus gel, colored by significance, in controls. (B) Corresponding Random Forests results, color-coded as in A. (C) Z-scores from the Wilcoxon test, ranked from most abundant in the lumen to most abundant in the mucus gel, colored by significance, in UC. (D) Corresponding Random Forests results, color-coded as in C.

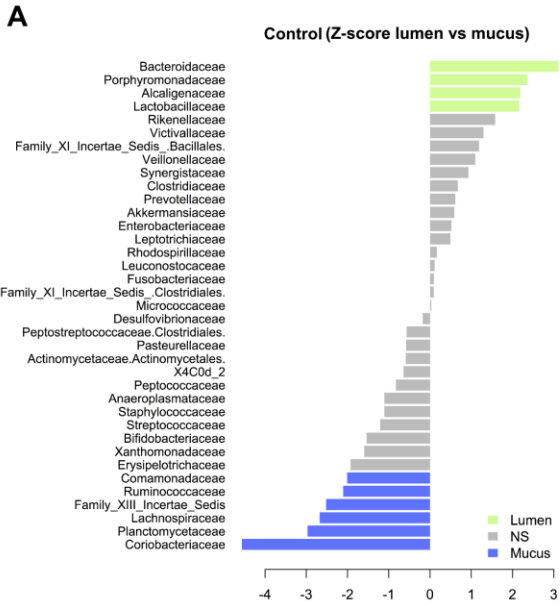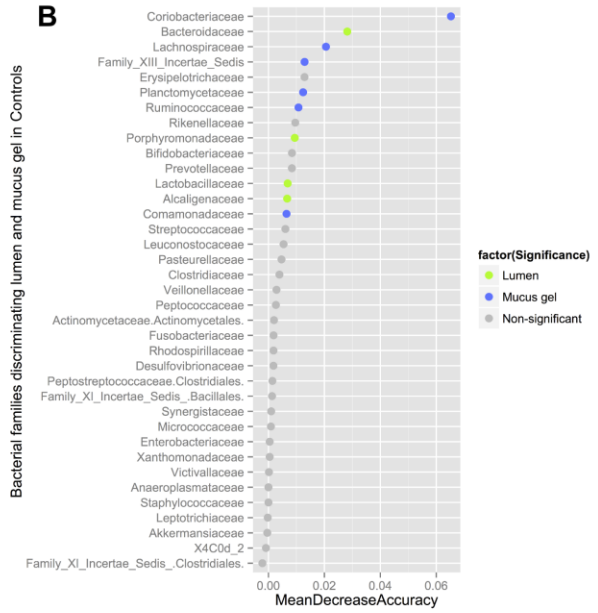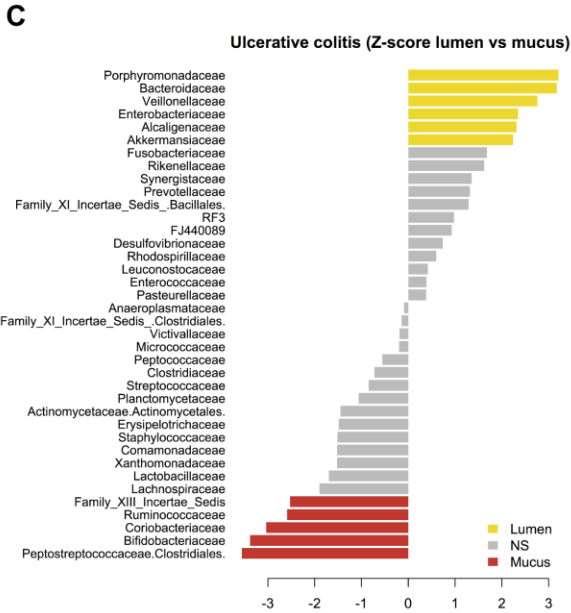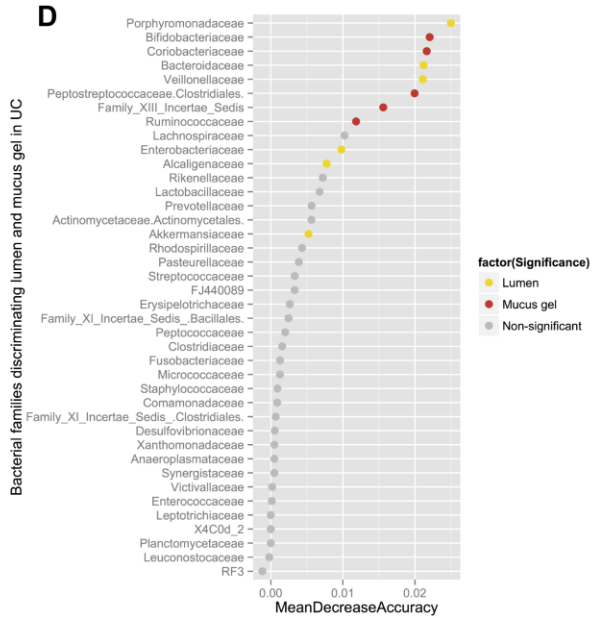

## Supplementary figure 6

Boxplots of four alpha diversity indices, Shannon diversity, Simpson index, chao1 and Faith's phylogenetic diversity, for the three cross-sectional spatial samples sets, luminal (A), whole mucosal biopsies (B) and mucus gel layer (C).

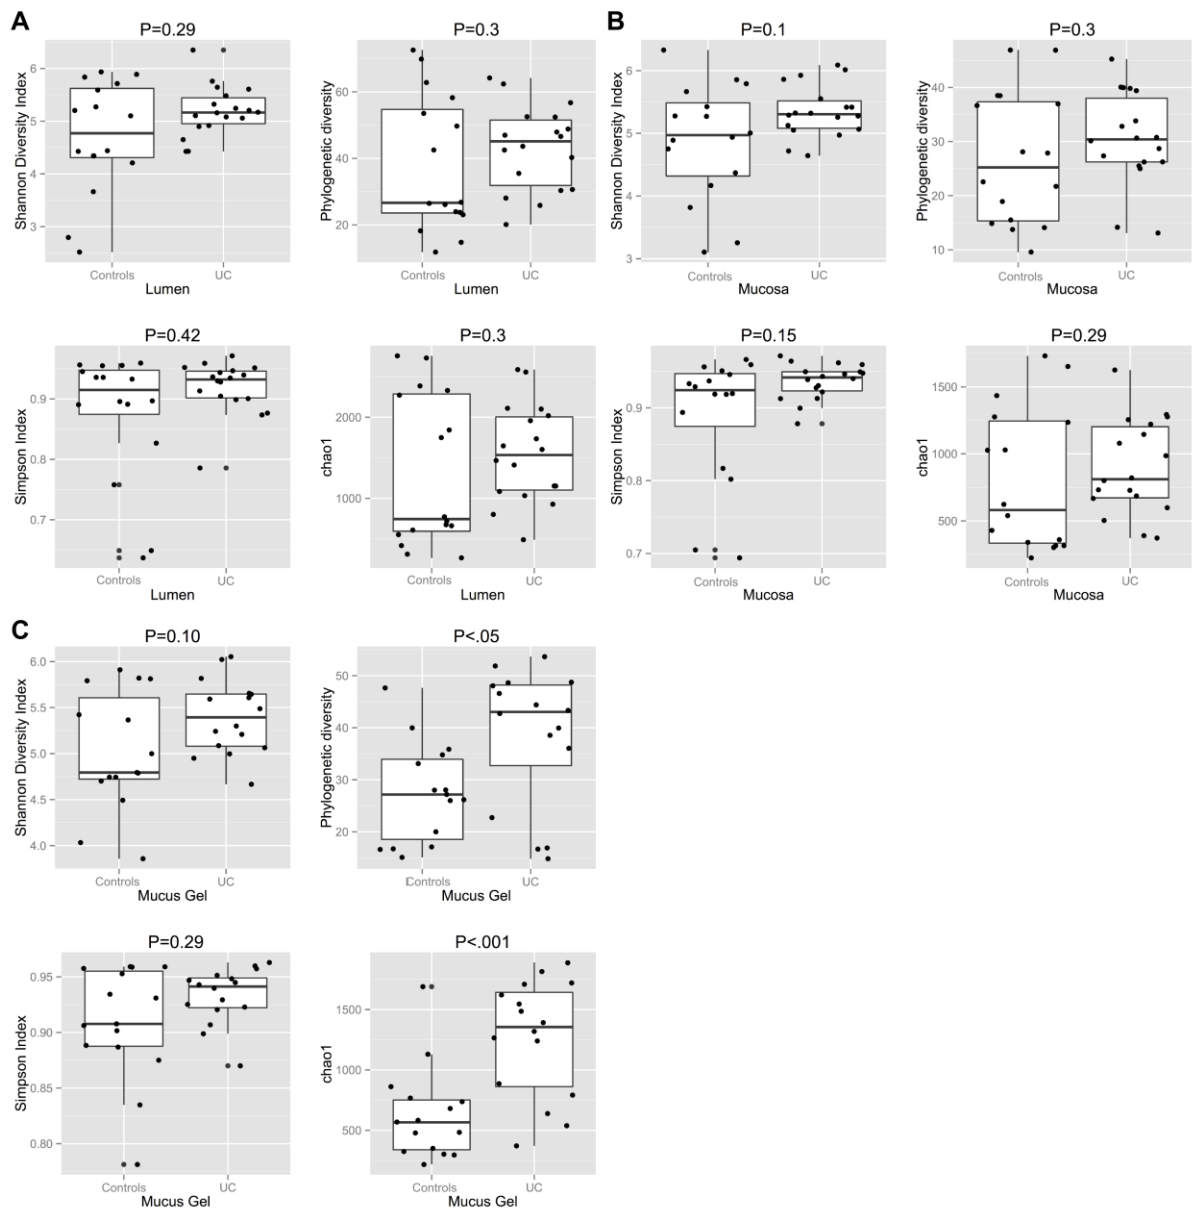

### Supplementary figure 7

Effects of regional inflammation on the microbiota. Differences in fitted RDA values from the AEM analysis (Figure 3C and 3D) compared with the matched inflammatory score, demonstrating no significant correlation (A). Microbial diversity, as measured by the Shannon Diversity Index (H) for luminal, mucosal and mucus gel samples, demonstrating no correlation between alpha-diversity and local inflammation for any of the three spatial locations (B). There was no significant difference between the luminal (Spearman rho -0.19) and mucus gel (Spearman rho 0.3) trends, when compared by non-parametric ANCOVA. Comparison of the luminal, mucosal and mucus gel microbiota in UC using CAP, factoring out inter-personal variability and colorectal location, demonstrating that inflammation is orthogonal to the axis that separates the three spatial locations and thus does not effect one more than the other (C).

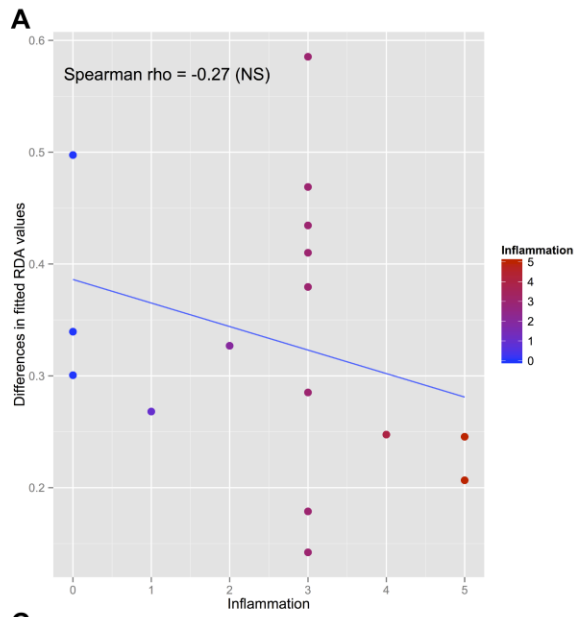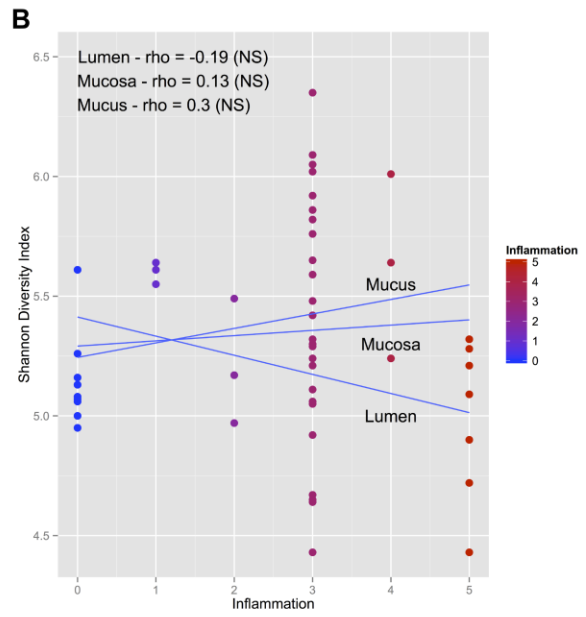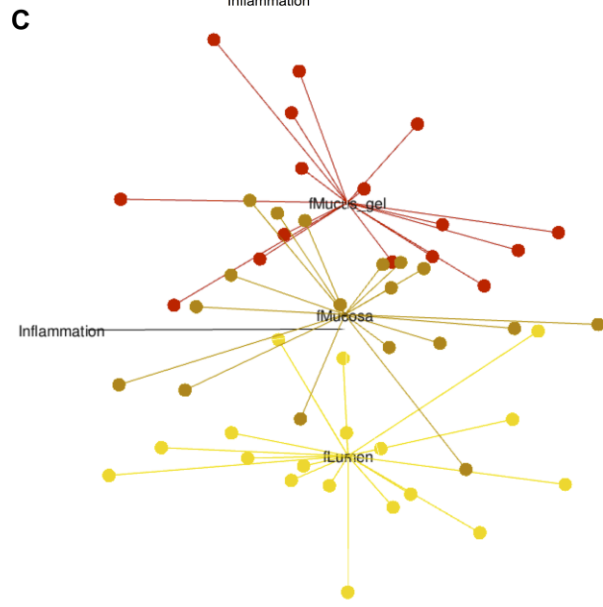

Supplement: gutjnl-2014-307873-s1.pdf [file gutjnl-2014-307873-s1.pdf]
