# Supplementary material for: Spatial variation of the colonic microbiota in patients with ulcerative colitis and control volunteers
Source: PubMed Central journal article supplement — Gut. 2015 Jan 16;64(10):1553–61. doi: 10.1136/gutjnl-2014-307873 (PMC4602252; doi:10.1136/gutjnl-2014-307873), 2015-01-16
Supplement: gutjnl-2014-307873-s2.pdf [file gutjnl-2014-307873-s2.pdf]

Table S1: Samples used in analysis 1

| Individual     | Lumen | Mucosa                                       | Mucus gel                                     |
|----------------|-------|----------------------------------------------|-----------------------------------------------|
| <b>Control</b> | A     | Caecum<br>Transverse<br>Descending<br>Rectum | Caecum<br>Transverse<br>*Descending<br>Rectum |
|                | B     | Caecum<br>Transverse<br>Descending<br>Rectum | Caecum<br>Transverse<br>Descending<br>*Rectum |
|                | C     | Caecum<br>Transverse<br>Descending<br>Rectum | Caecum<br>Transverse<br>Descending<br>Rectum  |
|                | D     | Caecum<br>Transverse<br>Descending<br>Rectum | Caecum<br>Transverse<br>Descending<br>Rectum  |
| <b>UC</b>      | A     | Caecum<br>Transverse<br>Descending<br>Rectum | Caecum<br>Transverse<br>Descending<br>Rectum  |
|                | B     | Caecum<br>Transverse<br>Descending<br>Rectum | Caecum<br>Transverse<br>Descending<br>Rectum  |
|                | C     | Caecum<br>Transverse<br>Descending<br>Rectum | Caecum<br>Transverse<br>Descending<br>Rectum  |
|                | D     | Caecum<br>Transverse<br>Descending<br>Rectum | Caecum<br>Transverse<br>Descending<br>Rectum  |
|                | **E   | Caecum<br>Rectum                             | Caecum<br>Rectum                              |

\*Removed from pipeline prior to pyrosequencing as insufficient DNA quantity

\*\*Not included in AEM analysis

**Table S2: Abundance of bacterial families from lumen-mucosa-mucus for the entire cohort**

|                                          | Lumen    |       | Mucosa   |        | Mucus    |        | *P-value  |
|------------------------------------------|----------|-------|----------|--------|----------|--------|-----------|
|                                          | Mean (%) | SD    | Mean (%) | SD     | Mean (%) | SD     |           |
| Actinomycetaceae(Actinomycetales)        | 0.054    | 0.075 | 0.059    | 0.089  | 0.131    | 0.184  | 0.21      |
| Akkermansiaceae                          | 0.898    | 1.636 | 0.857    | 1.796  | 0.713    | 1.504  | 0.52      |
| Alcaligenaceae                           | 2.972    | 2.655 | 2.149    | 1.987  | 1.384    | 1.436  | <0.05*    |
| Anaeroplasmataceae                       | 0.156    | 0.488 | 0.215    | 0.645  | 0.136    | 0.359  | 0.85      |
| Bacteroidaceae                           | 22.832   | 18.05 | 19.931   | 17.056 | 10.696   | 12.487 | <0.001*** |
| Bifidobacteriaceae                       | 0.556    | 0.713 | 0.847    | 0.87   | 1.72     | 1.622  | <0.01**   |
| Clostridiaceae                           | 0.635    | 1.857 | 0.757    | 1.907  | 0.692    | 1.45   | 0.9       |
| Comamonadaceae                           | 0.008    | 0.022 | 0.008    | 0.018  | 0.045    | 0.101  | 0.08      |
| Coriobacteriaceae                        | 0.179    | 0.407 | 0.141    | 0.162  | 0.518    | 0.303  | <0.001*** |
| Desulfovibrionaceae                      | 1.018    | 1.649 | 1.117    | 2.168  | 0.987    | 1.853  | 0.82      |
| Enterobacteriaceae                       | 2.727    | 5.345 | 2.26     | 4.064  | 0.93     | 1.844  | 0.3       |
| Enterococcaceae                          | 0.009    | 0.033 | 0.007    | 0.033  | 0.003    | 0.012  | 0.9       |
| Erysipelotrichaceae                      | 7.375    | 7.44  | 8.695    | 7.743  | 13.705   | 10.756 | 0.05      |
| Family_XI_Incertae_Sedis_(Bacillales)    | 0.016    | 0.029 | 0.018    | 0.055  | 0.006    | 0.015  | 0.19      |
| Family_XI_Incertae_Sedis_(Clostridiales) | 1.012    | 2.975 | 0.855    | 2.596  | 0.895    | 2.397  | 0.72      |
| Family_XIII_Incertae_Sedis               | 0.066    | 0.095 | 0.097    | 0.174  | 0.18     | 0.151  | <0.001*** |
| FJ440089                                 | 0.026    | 0.062 | 0.014    | 0.032  | 0.008    | 0.019  | 0.85      |
| Fusobacteriaceae                         | 0.18     | 0.822 | 0.137    | 0.61   | 0.02     | 0.061  | 0.54      |
| Lachnospiraceae                          | 17.25    | 8.536 | 20.998   | 9.093  | 23.852   | 6.481  | <0.01**   |
| Lactobacillaceae                         | 0.008    | 0.016 | 0.01     | 0.033  | 0.05     | 0.149  | 0.56      |
| Leptotrichiaceae                         | 0.004    | 0.012 | 0.003    | 0.011  | 0.004    | 0.014  | 0.83      |
| Leuconostocaceae                         | 0.212    | 0.597 | 0.189    | 0.545  | 0.142    | 0.358  | 0.94      |
| Micrococcaceae                           | 0.012    | 0.024 | 0.023    | 0.051  | 0.018    | 0.035  | 0.98      |
| Pasteurellaceae                          | 0.994    | 2.029 | 1.235    | 2.931  | 0.589    | 0.913  | 0.95      |
| Peptococcaceae                           | 0.042    | 0.13  | 0.082    | 0.26   | 0.056    | 0.138  | 0.57      |
| Peptostreptococcaceae(Clostridiales)     | 0.408    | 0.595 | 0.697    | 1.104  | 1.556    | 1.973  | <0.05*    |
| Planctomycetaceae                        | 0        | 0     | 0.002    | 0.007  | 0.023    | 0.061  | <0.01**   |
| Porphyromonadaceae                       | 2.573    | 1.434 | 2.352    | 1.353  | 1.231    | 0.802  | <0.001*** |

|                   |        |        |        |        |        |        |         |
|-------------------|--------|--------|--------|--------|--------|--------|---------|
| Prevotellaceae    | 4.164  | 4.758  | 3.957  | 4.336  | 2.355  | 2.58   | 0.67    |
| RF3               | 0.013  | 0.061  | 0.009  | 0.036  | 0.005  | 0.022  | 0.66    |
| Rhodospirillaceae | 0.195  | 0.29   | 0.181  | 0.243  | 0.115  | 0.147  | 0.83    |
| Rikenellaceae     | 6.337  | 7.75   | 4.67   | 4.887  | 3.076  | 2.792  | 0.1     |
| Ruminococcaceae   | 24.688 | 12.133 | 25.068 | 11.524 | 31.954 | 10.527 | <0.01** |
| Staphylococcaceae | 0.003  | 0.014  | 0.011  | 0.027  | 0.019  | 0.044  | 0.19    |
| Streptococcaceae  | 0.699  | 1.025  | 0.846  | 1.134  | 1.043  | 1.456  | 0.43    |
| Synergistaceae    | 0.033  | 0.115  | 0.042  | 0.198  | 0.009  | 0.031  | 0.28    |
| Veillonellaceae   | 1.593  | 1.117  | 1.373  | 0.851  | 0.998  | 0.796  | 0.04    |
| Victivallaceae    | 0.042  | 0.167  | 0.065  | 0.197  | 0.036  | 0.119  | 0.87    |
| 4C0d_2            | 0.012  | 0.037  | 0.022  | 0.079  | 0.017  | 0.056  | 0.83    |
| Xanthomonadaceae  | 0      | 0      | 0.001  | 0.005  | 0.084  | 0.393  | <0.05*  |

\*Uncorrected p-values as determined by the Kruskal-Wallis test. Significance values: <0.05=\*, <0.01=\*\*, <0.001=\*\*\*.

Table S3: Family-level abundances between health and UC

|                                         | Health  |       | UC      |      | *P-value  |
|-----------------------------------------|---------|-------|---------|------|-----------|
|                                         | Mean(%) | SD    | Mean(%) | SD   |           |
| Pasteurellaceae                         | 1.22    | 1.88  | 0.73    | 2.38 | 0.42      |
| Xanthomonadaceae                        | 0.05    | 0.31  | 0.01    | 0.03 | 0.55      |
| Enterobacteriaceae                      | 2.4     | 4.91  | 1.7     | 3.32 | <1E-5***  |
| Rhodospirillaceae                       | 0.12    | 0.17  | 0.21    | 0.28 | 0.29      |
| Alcaligenaceae                          | 1.28    | 0.96  | 3.01    | 2.61 | <0.001*** |
| Comamonadaceae                          | 0.04    | 0.08  | 0       | 0.02 | <1E-5***  |
| Desulfovibrionaceae                     | 1.56    | 2.5   | 0.59    | 0.93 | <0.01**   |
| Planctomycetaceae                       | 0.02    | 0.05  | 0       | 0.01 | <0.01**   |
| X4C0d_2                                 | 0.04    | 0.08  | 0       | 0    | <1E-4***  |
| Bacteroidaceae                          | 27.08   | 20.41 | 10.49   | 6.59 | <1E-6***  |
| Prevotellaceae                          | 4.95    | 5.21  | 2.34    | 2.23 | 0.1       |
| Rikenellaceae                           | 3.42    | 2.77  | 5.95    | 7.23 | 0.2       |
| Porphyromonadaceae                      | 2.31    | 1.52  | 1.91    | 1.19 | 0.28      |
| FJ440089                                | 0       | 0     | 0.03    | 0.05 | <1E-5***  |
| Micrococcaceae                          | 0.01    | 0.01  | 0.03    | 0.05 | 0.01      |
| Bifidobacteriaceae                      | 0.46    | 1.01  | 1.48    | 1.16 | <1E-9***  |
| Actinomycetaceae.Actinomycetales.       | 0.03    | 0.04  | 0.12    | 0.15 | <0.001*** |
| Coriobacteriaceae                       | 0.18    | 0.23  | 0.34    | 0.41 | 0.02      |
| Streptococcaceae                        | 0.79    | 1.36  | 0.91    | 1.05 | 0.15      |
| Enterococcaceae                         | 0       | 0     | 0.01    | 0.04 | 0.01      |
| Lactobacillaceae                        | 0       | 0.01  | 0.04    | 0.11 | 0.03      |
| Leuconostocaceae                        | 0.39    | 0.7   | 0       | 0.01 | 0.01      |
| Staphylococcaceae                       | 0       | 0.02  | 0.02    | 0.04 | <0.01**   |
| Family_XI_Incertae_Sedis_Bacillales.    | 0.02    | 0.05  | 0.01    | 0.03 | 0.2       |
| Erysipelotrichaceae                     | 11.63   | 8.31  | 8.09    | 9.27 | <0.01**   |
| Lachnospiraceae                         | 20.16   | 8.21  | 20.87   | 8.88 | 0.78      |
| Peptostreptococcaceae.Clostridiales.    | 0.14    | 0.17  | 1.47    | 1.65 | <1E-12*** |
| Veillonellaceae                         | 1.16    | 0.78  | 1.49    | 1.08 | 0.21      |
| Ruminococcaceae                         | 18.43   | 8.55  | 34.41   | 8.84 | <1E-11*** |
| Clostridiaceae                          | 0       | 0.01  | 1.29    | 2.23 | <1E-15*** |
| Family_XIII_Incertae_Sedis              | 0.09    | 0.08  | 0.13    | 0.19 | 0.33      |
| Peptococcaceae                          | 0.12    | 0.26  | 0.01    | 0.02 | 0.06      |
| Family_XI_Incertae_Sedis_Clostridiales. | 0.09    | 0.3   | 1.64    | 3.47 | 0.16      |
| Fusobacteriaceae                        | 0.03    | 0.06  | 0.19    | 0.82 | 0.01      |
| Leptotrichiaceae                        | 0.01    | 0.02  | 0       | 0    | <0.001*** |
| Akkermansiaceae                         | 1.76    | 2.05  | 0.02    | 0.1  | <1E-14*** |
| Anaeroplasmataceae                      | 0       | 0     | 0.32    | 0.67 | <0.01**   |
| RF3                                     | 0       | 0     | 0.02    | 0.06 | <0.01**   |
| Victivallaceae                          | 0       | 0.01  | 0.09    | 0.22 | <0.01**   |
| Synergistaceae                          | 0.02    | 0.04  | 0.04    | 0.18 | <0.01**   |

\*Uncorrected p-values as determined by the Wilcoxon rank test. Significance values: <0.05=\*, <0.01=\*\*, <0.001=\*\*\*.

Table S4: Genus-level abundances between health and UC

|                              | Health  |      | UC      |      | *P-values |
|------------------------------|---------|------|---------|------|-----------|
|                              | Mean(%) | SD   | Mean(%) | SD   |           |
| 0319-6G20                    | 0.03    | 0.11 | 0       | 0    | 0.06      |
| 4C0d-2                       | 0.05    | 0.11 | 0       | 0    | <1E-4***  |
| Acidaminococcus              | 0.09    | 0.17 | 0       | 0    | <1E-4***  |
| Actinomyces                  | 0.04    | 0.06 | 0.16    | 0.21 | <0.001*** |
| Akkermansia                  | 2.19    | 2.53 | 0.02    | 0.11 | <1E-14*** |
| Alistipes                    | 2.9     | 1.82 | 4.62    | 4.22 | 0.16      |
| Anaerococcus                 | 0.07    | 0.36 | 0.24    | 0.61 | 0.11      |
| Anaeroplasma                 | 0       | 0    | 0.46    | 0.99 | <0.01**   |
| Anaerostipes                 | 0.25    | 0.34 | 0.44    | 0.81 | 0.3       |
| Anaerotruncus                | 0.05    | 0.07 | 0.12    | 0.18 | 0.04      |
| Asteroleplasma               | 0.08    | 0.16 | 0.11    | 0.25 | 0.93      |
| Atopobium                    | 0       | 0    | 0       | 0.01 | 0.63      |
| Bacteroides                  | 32.59   | 22.2 | 13.71   | 8.36 | <1E-6***  |
| Barnesiella                  | 0.07    | 0.08 | 0.09    | 0.14 | 0.62      |
| Bifidobacterium              | 0.58    | 1.28 | 1.94    | 1.48 | <1E-9***  |
| Bilophila                    | 0.26    | 0.29 | 0.21    | 0.31 | 0.11      |
| Blautia                      | 3.06    | 2.76 | 2.5     | 2.72 | 0.38      |
| Butyricimonas                | 0.12    | 0.16 | 0.02    | 0.05 | <1E-4***  |
| Campylobacter                | 0       | 0.02 | 0       | 0    | 0.07      |
| Catabacter                   | 0.02    | 0.03 | 0.02    | 0.03 | 0.38      |
| Catenibacterium              | 0       | 0    | 0.24    | 0.58 | <0.01**   |
| Chryseobacterium             | 0       | 0.02 | 0.01    | 0.05 | 0.14      |
| Cloacibacillus               | 0.02    | 0.04 | 0       | 0    | <1E-4***  |
| Clostridium_(Clostridiaceae) | 0       | 0.01 | 1.53    | 2.6  | <1E-14*** |
| Collinsella                  | 0.11    | 0.17 | 0.3     | 0.46 | <0.001*** |
| Comamonas                    | 0.01    | 0.03 | 0       | 0    | <0.001*** |
| Coprococcus                  | 0.24    | 0.27 | 0.1     | 0.2  | <0.001*** |
| Coriobacteriaceae_bacterium  | 0.03    | 0.05 | 0       | 0.01 | <0.001*** |
| Desulfovibrio                | 1.82    | 3.22 | 0.62    | 1.12 | 0.02      |
| Dialister                    | 0.12    | 0.16 | 0.11    | 0.15 | 0.6       |
| Dorea                        | 0.79    | 0.61 | 0.45    | 0.5  | <0.01**   |
| DQ804406                     | 0       | 0    | 0       | 0.01 | 0.06      |
| Eggerthella                  | 0.02    | 0.08 | 0.04    | 0.09 | 0.17      |
| Enterococcus                 | 0       | 0    | 0.01    | 0.05 | 0.01      |
| Enterorhabdus                | 0       | 0.01 | 0       | 0.01 | 0.65      |
| Erysipelotrichaceae_I_S      | 11.99   | 8.72 | 8.28    | 10.6 | <0.01**   |
| Escherichia_Shigella         | 2.66    | 5.42 | 2.13    | 3.83 | <1E-5***  |
| Faecalibacterium             | 10.19   | 5.86 | 17.95   | 6.7  | <1E-7***  |
| FJ440089                     | 0       | 0    | 0.04    | 0.09 | <1E-5***  |
| Flavobacterium               | 0.03    | 0.11 | 0       | 0    | 0.01      |
| Fusobacterium                | 0.04    | 0.09 | 0.01    | 0.04 | <0.01**   |
| Gemella                      | 0.02    | 0.05 | 0.01    | 0.03 | 0.2       |
| GQ079293                     | 0.01    | 0.03 | 0       | 0.01 | 0.5       |

|                                  |      |      |      |      |           |
|----------------------------------|------|------|------|------|-----------|
| <b>GQ897367</b>                  | 0.05 | 0.09 | 0    | 0.01 | <0.01**   |
| <b>Haemophilus</b>               | 1.46 | 2.24 | 0.51 | 1.55 | 0.25      |
| <b>Holdemania</b>                | 0.11 | 0.15 | 0.06 | 0.07 | 0.07      |
| <b>Jonquetella</b>               | 0    | 0    | 0.04 | 0.21 | 0.06      |
| <b>Lachnospira</b>               | 0.18 | 0.21 | 0.92 | 3.15 | 0.11      |
| <b>Lachnospiraceae_I_S</b>       | 2.48 | 0.79 | 2.42 | 1.5  | 0.16      |
| <b>Lactobacillus</b>             | 0    | 0.01 | 0.05 | 0.15 | 0.03      |
| <b>Lactococcus</b>               | 0    | 0.01 | 0    | 0.01 | 0.13      |
| <b>Leptotrichia</b>              | 0.01 | 0.02 | 0    | 0    | <0.01**   |
| <b>Leuconostoc</b>               | 0    | 0    | 0    | 0.01 | 0.06      |
| <b>Marvinbryantia</b>            | 0.01 | 0.03 | 0    | 0    | <0.001*** |
| <b>Megasphaera</b>               | 0    | 0    | 0.47 | 0.97 | 0.02      |
| <b>Mogibacterium</b>             | 0.02 | 0.09 | 0.03 | 0.11 | 0.64      |
| <b>Moryella</b>                  | 0    | 0    | 0.03 | 0.15 | 0.06      |
| <b>Neisseria</b>                 | 0    | 0.02 | 0    | 0    | 0.03      |
| <b>Odoribacter</b>               | 0.75 | 0.44 | 0.59 | 0.49 | 0.03      |
| <b>Oribacterium</b>              | 0    | 0.01 | 0    | 0.01 | 0.57      |
| <b>Oxalobacteraceae</b>          | 0.01 | 0.02 | 0    | 0    | 0.01      |
| <b>Parabacteroides</b>           | 1.9  | 1.56 | 1.64 | 1.29 | 0.61      |
| <b>Paraprevotella</b>            | 0    | 0.01 | 0.28 | 0.44 | <1E-9***  |
| <b>Parasutterella</b>            | 0.04 | 0.08 | 2.24 | 3.42 | <1E-13*** |
| <b>Parvimonas</b>                | 0.02 | 0.04 | 1.65 | 3.5  | 0.04      |
| <b>Peptoniphilus</b>             | 0.01 | 0.03 | 0.3  | 0.72 | 0.02      |
| <b>Peptostreptococcaceae_I_S</b> | 0.15 | 0.2  | 1.87 | 2.11 | <1E-12*** |
| <b>Peptostreptococcus</b>        | 0.01 | 0.02 | 0.02 | 0.1  | 0.05      |
| <b>Phascolarctobacterium</b>     | 0.78 | 0.97 | 0.83 | 0.8  | 0.45      |
| <b>Porphyromonas</b>             | 0.01 | 0.02 | 0.19 | 0.38 | 0.11      |
| <b>Prevotella</b>                | 6.45 | 6.91 | 2.78 | 2.6  | 0.08      |
| <b>Propionibacterium</b>         | 0.08 | 0.22 | 0.03 | 0.2  | 0.04      |
| <b>Pseudobutyrvibrio</b>         | 1.03 | 0.82 | 3.73 | 3.9  | 0.01      |
| <b>RC9_gut_group</b>             | 1.43 | 2.89 | 3.66 | 9.76 | 0.32      |
| <b>RF3</b>                       | 0    | 0    | 0.02 | 0.08 | 0         |
| <b>RF9</b>                       | 0    | 0.02 | 0.02 | 0.06 | 0.03      |
| <b>Roseburia</b>                 | 0.95 | 0.65 | 0.79 | 0.68 | 0.12      |
| <b>Rothia</b>                    | 0    | 0.01 | 0.03 | 0.05 | <0.01**   |
| <b>Ruminococcaceae_I_S</b>       | 1.19 | 0.71 | 3    | 2.07 | <1E-7***  |
| <b>Ruminococcus</b>              | 3.74 | 4.22 | 7.85 | 4.95 | <1E-5***  |
| <b>Schlesneria</b>               | 0.01 | 0.03 | 0    | 0    | 0.01      |
| <b>Staphylococcus</b>            | 0    | 0.02 | 0.02 | 0.05 | <0.01**   |
| <b>Streptococcus</b>             | 1.08 | 1.86 | 1.2  | 1.41 | 0.16      |
| <b>Subdoligranulum</b>           | 2.86 | 2.11 | 3.48 | 3.05 | 0.68      |
| <b>Succiniclasticum</b>          | 0    | 0    | 0.48 | 1.01 | <0.01**   |
| <b>Sutterella</b>                | 1.53 | 1.06 | 1.67 | 2.32 | 0.02      |
| <b>Thalassospira</b>             | 0.16 | 0.23 | 0.28 | 0.37 | 0.29      |
| <b>Turicibacter</b>              | 0    | 0    | 0.03 | 0.04 | <1E-6***  |
| <b>Veillonella</b>               | 0.38 | 0.63 | 0.09 | 0.2  | 0.03      |
| <b>Victivallis</b>               | 0    | 0.01 | 0.13 | 0.3  | 0.01      |
| <b>Weissella</b>                 | 0.54 | 0.95 | 0    | 0.01 | <0.01**   |

\*Uncorrected p-values as determined by the Wilcoxon rank test. Significance values:  
<math><0.05=^\*</math>, <math><0.01=^{\*\*}</math>, <math><0.001=^{\*\*\*}</math>.

Table S5a: Family-level abundances between luminal and mucosal samples in health

|                                          | Lumen (health) |        | Mucosa (health) |        | Mucus gel (health) |        | *P-value |
|------------------------------------------|----------------|--------|-----------------|--------|--------------------|--------|----------|
|                                          | Mean           | SD     | Mean            | SD     | Mean               | SD     |          |
| Actinomycetaceae.Actinomycetales.        | 0.022          | 0.027  | 0.019           | 0.029  | 0.048              | 0.067  | 0.55     |
| Akkermansiaceae                          | 1.861          | 1.999  | 1.807           | 2.297  | 1.59               | 1.942  | 0.55     |
| Alcaligenaceae                           | 1.746          | 1.216  | 1.176           | 0.797  | 0.841              | 0.448  | 0.03     |
| Anaeroplasmataceae                       | 0              | 0      | 0               | 0      | 0.002              | 0.006  | 0.27     |
| Bacteroidaceae                           | 33.307         | 20.983 | 29.367          | 20.388 | 16.609             | 16.725 | <0.01**  |
| Bifidobacteriaceae                       | 0.168          | 0.216  | 0.229           | 0.263  | 1.101              | 1.718  | 0.12     |
| Clostridiaceae                           | 0.004          | 0.006  | 0.001           | 0.004  | 0.005              | 0.013  | 0.5      |
| Comamonadaceae                           | 0.017          | 0.031  | 0.018           | 0.023  | 0.09               | 0.138  | <0.05*   |
| Coriobacteriaceae                        | 0.042          | 0.035  | 0.103           | 0.12   | 0.461              | 0.236  | <1E-5*** |
| Desulfovibrionaceae                      | 1.448          | 2.115  | 1.54            | 2.935  | 1.737              | 2.545  | 0.86     |
| Enterobacteriaceae                       | 2.945          | 5.736  | 3.142           | 5.629  | 0.819              | 1.985  | 0.61     |
| Erysipelotrichaceae                      | 8.638          | 6.737  | 10.567          | 7.369  | 16.612             | 9.403  | 0.05     |
| Family_XI_Incertae_Sedis_.Bacillales.    | 0.017          | 0.024  | 0.025           | 0.075  | 0.007              | 0.015  | 0.23     |
| Family_XI_Incertae_Sedis_.Clostridiales. | 0.06           | 0.116  | 0.037           | 0.056  | 0.188              | 0.545  | 0.93     |
| Family_XIII_Incertae_Sedis               | 0.061          | 0.035  | 0.058           | 0.044  | 0.148              | 0.109  | <0.05*   |
| Fusobacteriaceae                         | 0.037          | 0.063  | 0.019           | 0.039  | 0.046              | 0.086  | 0.92     |
| Lachnospiraceae                          | 16.394         | 7.402  | 20.378          | 9.795  | 24.522             | 4.405  | <0.01**  |
| Lactobacillaceae                         | 0.004          | 0.008  | 0.004           | 0.008  | 0                  | 0      | <0.05*   |
| Leptotrichiaceae                         | 0.009          | 0.017  | 0.007           | 0.016  | 0.008              | 0.021  | 0.62     |
| Leuconostocaceae                         | 0.446          | 0.821  | 0.4             | 0.75   | 0.311              | 0.493  | 0.91     |
| Micrococcaceae                           | 0.003          | 0.006  | 0.005           | 0.011  | 0.008              | 0.02   | 0.97     |
| Pasteurellaceae                          | 1.268          | 2.244  | 1.353           | 2.045  | 1.011              | 1.144  | 0.56     |
| Peptococcaceae                           | 0.085          | 0.183  | 0.162           | 0.368  | 0.109              | 0.196  | 0.41     |
| Peptostreptococcaceae.Clostridiales.     | 0.102          | 0.062  | 0.125           | 0.093  | 0.197              | 0.287  | 0.57     |
| Planctomycetaceae                        | 0              | 0      | 0.005           | 0.011  | 0.049              | 0.086  | <0.01**  |
| Porphyromonadaceae                       | 2.918          | 1.811  | 2.404           | 1.392  | 1.434              | 0.796  | <0.05*   |
| Prevotellaceae                           | 5.789          | 6.128  | 5.201           | 5.587  | 3.617              | 3.262  | 0.54     |
| Rhodospirillaceae                        | 0.126          | 0.188  | 0.129           | 0.187  | 0.098              | 0.128  | 0.87     |
| Rikenellaceae                            | 3.973          | 2.618  | 3.519           | 3.149  | 2.631              | 2.48   | 0.11     |
| Ruminococcaceae                          | 16.463         | 8.557  | 16.463          | 7.98   | 23.258             | 7.836  | <0.05*   |
| Staphylococcaceae                        | 0              | 0      | 0               | 0      | 0.01               | 0.035  | 0.27     |
| Streptococcaceae                         | 0.666          | 1.231  | 0.577           | 0.946  | 1.202              | 1.881  | 0.23     |



|                  |       |       |       |       |       |       |      |
|------------------|-------|-------|-------|-------|-------|-------|------|
| Synergistaceae   | 0.023 | 0.038 | 0.013 | 0.035 | 0.02  | 0.045 | 0.35 |
| Veillonellaceae  | 1.333 | 0.944 | 1.099 | 0.586 | 1.009 | 0.773 | 0.27 |
| Victivallaceae   | 0.004 | 0.011 | 0     | 0     | 0     | 0     | 0.19 |
| X4C0d_2          | 0.025 | 0.052 | 0.047 | 0.111 | 0.039 | 0.081 | 0.52 |
| Xanthomonadaceae | 0     | 0     | 0.002 | 0.008 | 0.164 | 0.586 | 0.11 |

\*Uncorrected p-values as determined by the Kruskal-Wallis test. Significance values: <0.05=\*, <0.01=\*\*, <0.001=\*\*\*.

Table S5b: Family-level abundances between luminal and mucosal samples in UC

|                                          | Lumen (UC) |       | Mucosa (UC) |       | Mucus gel (UC) |        | *P-value  |
|------------------------------------------|------------|-------|-------------|-------|----------------|--------|-----------|
|                                          | Mean       | SD    | Mean        | SD    | Mean           | SD     |           |
| Actinomycetaceae.Actinomycetales.        | 0.083      | 0.092 | 0.095       | 0.108 | 0.199          | 0.221  | 0.15      |
| Akkermansiaceae                          | 0.042      | 0.155 | 0.013       | 0.049 | 0              | 0      | <0.05*    |
| Alcaligenaceae                           | 4.061      | 3.115 | 3.015       | 2.327 | 1.826          | 1.796  | <0.05*    |
| Anaeroplasmataceae                       | 0.295      | 0.648 | 0.407       | 0.852 | 0.245          | 0.461  | 0.93      |
| Bacteroidaceae                           | 13.521     | 6.994 | 11.544      | 6.298 | 5.891          | 3.512  | <0.01**   |
| Bifidobacteriaceae                       | 0.901      | 0.824 | 1.396       | 0.854 | 2.223          | 1.395  | <0.001*** |
| Clostridiaceae                           | 1.196      | 2.446 | 1.429       | 2.459 | 1.249          | 1.785  | 0.47      |
| Comamonadaceae                           | 0          | 0     | 0           | 0     | 0.008          | 0.028  | 0.13      |
| Coriobacteriaceae                        | 0.3        | 0.536 | 0.175       | 0.188 | 0.564          | 0.35   | <0.01**   |
| Desulfovibrionaceae                      | 0.637      | 1.002 | 0.74        | 1.098 | 0.377          | 0.59   | 0.46      |
| Enterobacteriaceae                       | 2.533      | 5.132 | 1.477       | 1.652 | 1.019          | 1.782  | <0.05*    |
| Enterococcaceae                          | 0.016      | 0.044 | 0.013       | 0.046 | 0.006          | 0.016  | 0.7       |
| Erysipelotrichaceae                      | 6.252      | 8.036 | 7.031       | 7.89  | 11.343         | 11.487 | 0.14      |
| Family_XI_Incertae_Sedis_.Bacillales.    | 0.015      | 0.033 | 0.011       | 0.026 | 0.004          | 0.016  | 0.2       |
| Family_XI_Incertae_Sedis_.Clostridiales. | 1.859      | 3.944 | 1.583       | 3.449 | 1.468          | 3.116  | 0.89      |
| Family_XIII_Incertae_Sedis               | 0.07       | 0.128 | 0.132       | 0.234 | 0.206          | 0.177  | <0.05*    |
| FJ440089                                 | 0.049      | 0.079 | 0.026       | 0.041 | 0.015          | 0.024  | 0.35      |
| Fusobacteriaceae                         | 0.307      | 1.128 | 0.242       | 0.835 | 0              | 0      | 0.09      |
| Lachnospiraceae                          | 18.01      | 9.58  | 21.55       | 8.669 | 23.308         | 7.886  | 0.06      |
| Lactobacillaceae                         | 0.011      | 0.02  | 0.015       | 0.045 | 0.091          | 0.194  | 0.09      |
| Leuconostocaceae                         | 0.003      | 0.01  | 0.002       | 0.005 | 0.004          | 0.017  | 0.67      |
| Micrococcaceae                           | 0.02       | 0.031 | 0.039       | 0.067 | 0.026          | 0.043  | 0.84      |
| Pasteurellaceae                          | 0.751      | 1.848 | 1.131       | 3.601 | 0.245          | 0.475  | 0.7       |
| Peptococcaceae                           | 0.004      | 0.008 | 0.01        | 0.022 | 0.012          | 0.024  | 0.58      |
| Peptostreptococcaceae.Clostridiales.     | 0.68       | 0.719 | 1.205       | 1.333 | 2.66           | 2.073  | <0.001*** |
| Planctomycetaceae                        | 0          | 0     | 0           | 0     | 0.003          | 0.01   | 0.29      |
| Porphyromonadaceae                       | 2.266      | 0.943 | 2.305       | 1.355 | 1.066          | 0.794  | <0.01**   |
| Prevotellaceae                           | 2.721      | 2.474 | 2.851       | 2.49  | 1.33           | 1.19   | 0.19      |
| RF3                                      | 0.025      | 0.083 | 0.018       | 0.049 | 0.009          | 0.029  | 0.33      |

|                   |        |        |        |       |       |       |         |
|-------------------|--------|--------|--------|-------|-------|-------|---------|
| Rhodospirillaceae | 0.256  | 0.351  | 0.228  | 0.28  | 0.13  | 0.164 | 0.55    |
| Rikenellaceae     | 8.439  | 10.03  | 5.693  | 5.938 | 3.439 | 3.053 | 0.1     |
| Ruminococcaceae   | 31.999 | 10.044 | 32.718 | 8.362 | 39.02 | 6.241 | <0.01** |
| Staphylococcaceae | 0.006  | 0.019  | 0.02   | 0.035 | 0.027 | 0.05  | 0.13    |
| Streptococcaceae  | 0.73   | 0.837  | 1.085  | 1.257 | 0.914 | 1.041 | 0.4     |
| Synergistaceae    | 0.042  | 0.156  | 0.067  | 0.271 | 0     | 0     | 0.18    |
| Veillonellaceae   | 1.824  | 1.232  | 1.616  | 0.984 | 0.989 | 0.84  | <0.01** |
| Victivallaceae    | 0.077  | 0.227  | 0.123  | 0.261 | 0.065 | 0.157 | 0.85    |
| Xanthomonadaceae  | 0      | 0      | 0      | 0     | 0.018 | 0.057 | 0.13    |

\*Uncorrected p-values as determined by the Kruskal-Wallis test. Significance values: <0.05=\*, <0.01=\*\*, <0.001=\*\*\*.

Table S6: Diversity indices between cohorts, compared by sampling locations

|                                            | Lumen   |         | Mucosa  |        | Mucus Gel |        | Sampling technique (Kruskal-Wallis) P-value |
|--------------------------------------------|---------|---------|---------|--------|-----------|--------|---------------------------------------------|
|                                            | Median  | IQR     | Median  | IQR    | Median    | IQR    |                                             |
| <b>Health</b>                              |         |         |         |        |           |        |                                             |
| <b>Simpson Index</b>                       | 0.91    | 0.07    | 0.92    | 0.07   | 0.91      | 0.07   | 0.82                                        |
| <b>Shannon Diversity Index</b>             | 4.77    | 1.31    | 4.97    | 1.17   | 4.79      | 0.88   | 0.89                                        |
| <b>chao1</b>                               | 745.14  | 1690.34 | 581.07  | 911.99 | 565.84    | 412.48 | 0.09                                        |
| <b>Phylogenetic Diversity</b>              | 26.65   | 31.1    | 25.22   | 22     | 27.16     | 15.41  | 0.35                                        |
| <b>Observed species</b>                    | 425     | 817     | 360     | 487.25 | 329       | 202    | 0.13                                        |
| <b>Ulcerative colitis</b>                  |         |         |         |        |           |        |                                             |
| <b>Simpson Index</b>                       | 0.93    | 0.04    | 0.93    | 0.04   | 0.94      | 0.03   | 0.32                                        |
| <b>Shannon Diversity Index</b>             | 5.16    | 0.49    | 5.16    | 0.49   | 5.31      | 0.44   | 0.43                                        |
| <b>chao1</b>                               | 1534.14 | 901.38  | 1534.14 | 901.38 | 810.72    | 530.55 | <0.01**                                     |
| <b>Phylogenetic Diversity</b>              | 45.12   | 19.65   | 45.12   | 19.65  | 30.4      | 11.77  | 0.01                                        |
| <b>Observed species</b>                    | 702.5   | 350.5   | 702.5   | 350.5  | 481.5     | 222    | <0.01**                                     |
| <b>Between cohorts (Wilcoxon rank sum)</b> | P-value |         | P-value |        | P-value   |        |                                             |
| <b>Simpson Index</b>                       | 0.42    |         | 0.15    |        | 0.3       |        |                                             |
| <b>Shannon Diversity Index</b>             | 0.3     |         | 0.11    |        | 0.1       |        |                                             |
| <b>chao1</b>                               | 0.31    |         | 0.3     |        | <0.001*** |        |                                             |
| <b>Phylogenetic Diversity</b>              | 0.31    |         | 0.31    |        | 0.02      |        |                                             |
| <b>Observed species</b>                    | 0.36    |         | 0.6     |        | <0.01**   |        |                                             |

Significance values: <0.05=\*, <0.01=\*\*, <0.001=\*\*\*.

**Table S7: Correlation of bacterial diversity with local inflammation**

|                  | Spearman rho | P-value |
|------------------|--------------|---------|
| <b>Lumen</b>     |              |         |
| Shannon          | -0.185       | 0.464   |
| Simpson          | -0.023       | 0.926   |
| chao1            | -0.37        | 0.131   |
| PD               | -0.288       | 0.247   |
| Observed species | -0.284       | 0.254   |
| <b>Mucosa</b>    |              |         |
| Shannon          | 0.13         | 0.607   |
| Simpson          | 0.155        | 0.54    |
| chao1            | -0.383       | 0.117   |
| PD               | -0.365       | 0.137   |
| Observed species | -0.338       | 0.17    |
| <b>Mucus gel</b> |              |         |
| Shannon          | 0.314        | 0.236   |
| Simpson          | 0.437        | 0.091   |
| chao1            | -0.135       | 0.618   |
| PD               | -0.074       | 0.784   |
| Observed species | -0.108       | 0.691   |
